# Supplementary figures and images for: Theoretical investigation of fused N-methyl-dithieno-pyrrole derivatives in the context of acceptor–donor–acceptor approach
Source: Royal Society of Chemistry journal article supplement (doi:10.1039/d2ra01820a), 2022-01-01

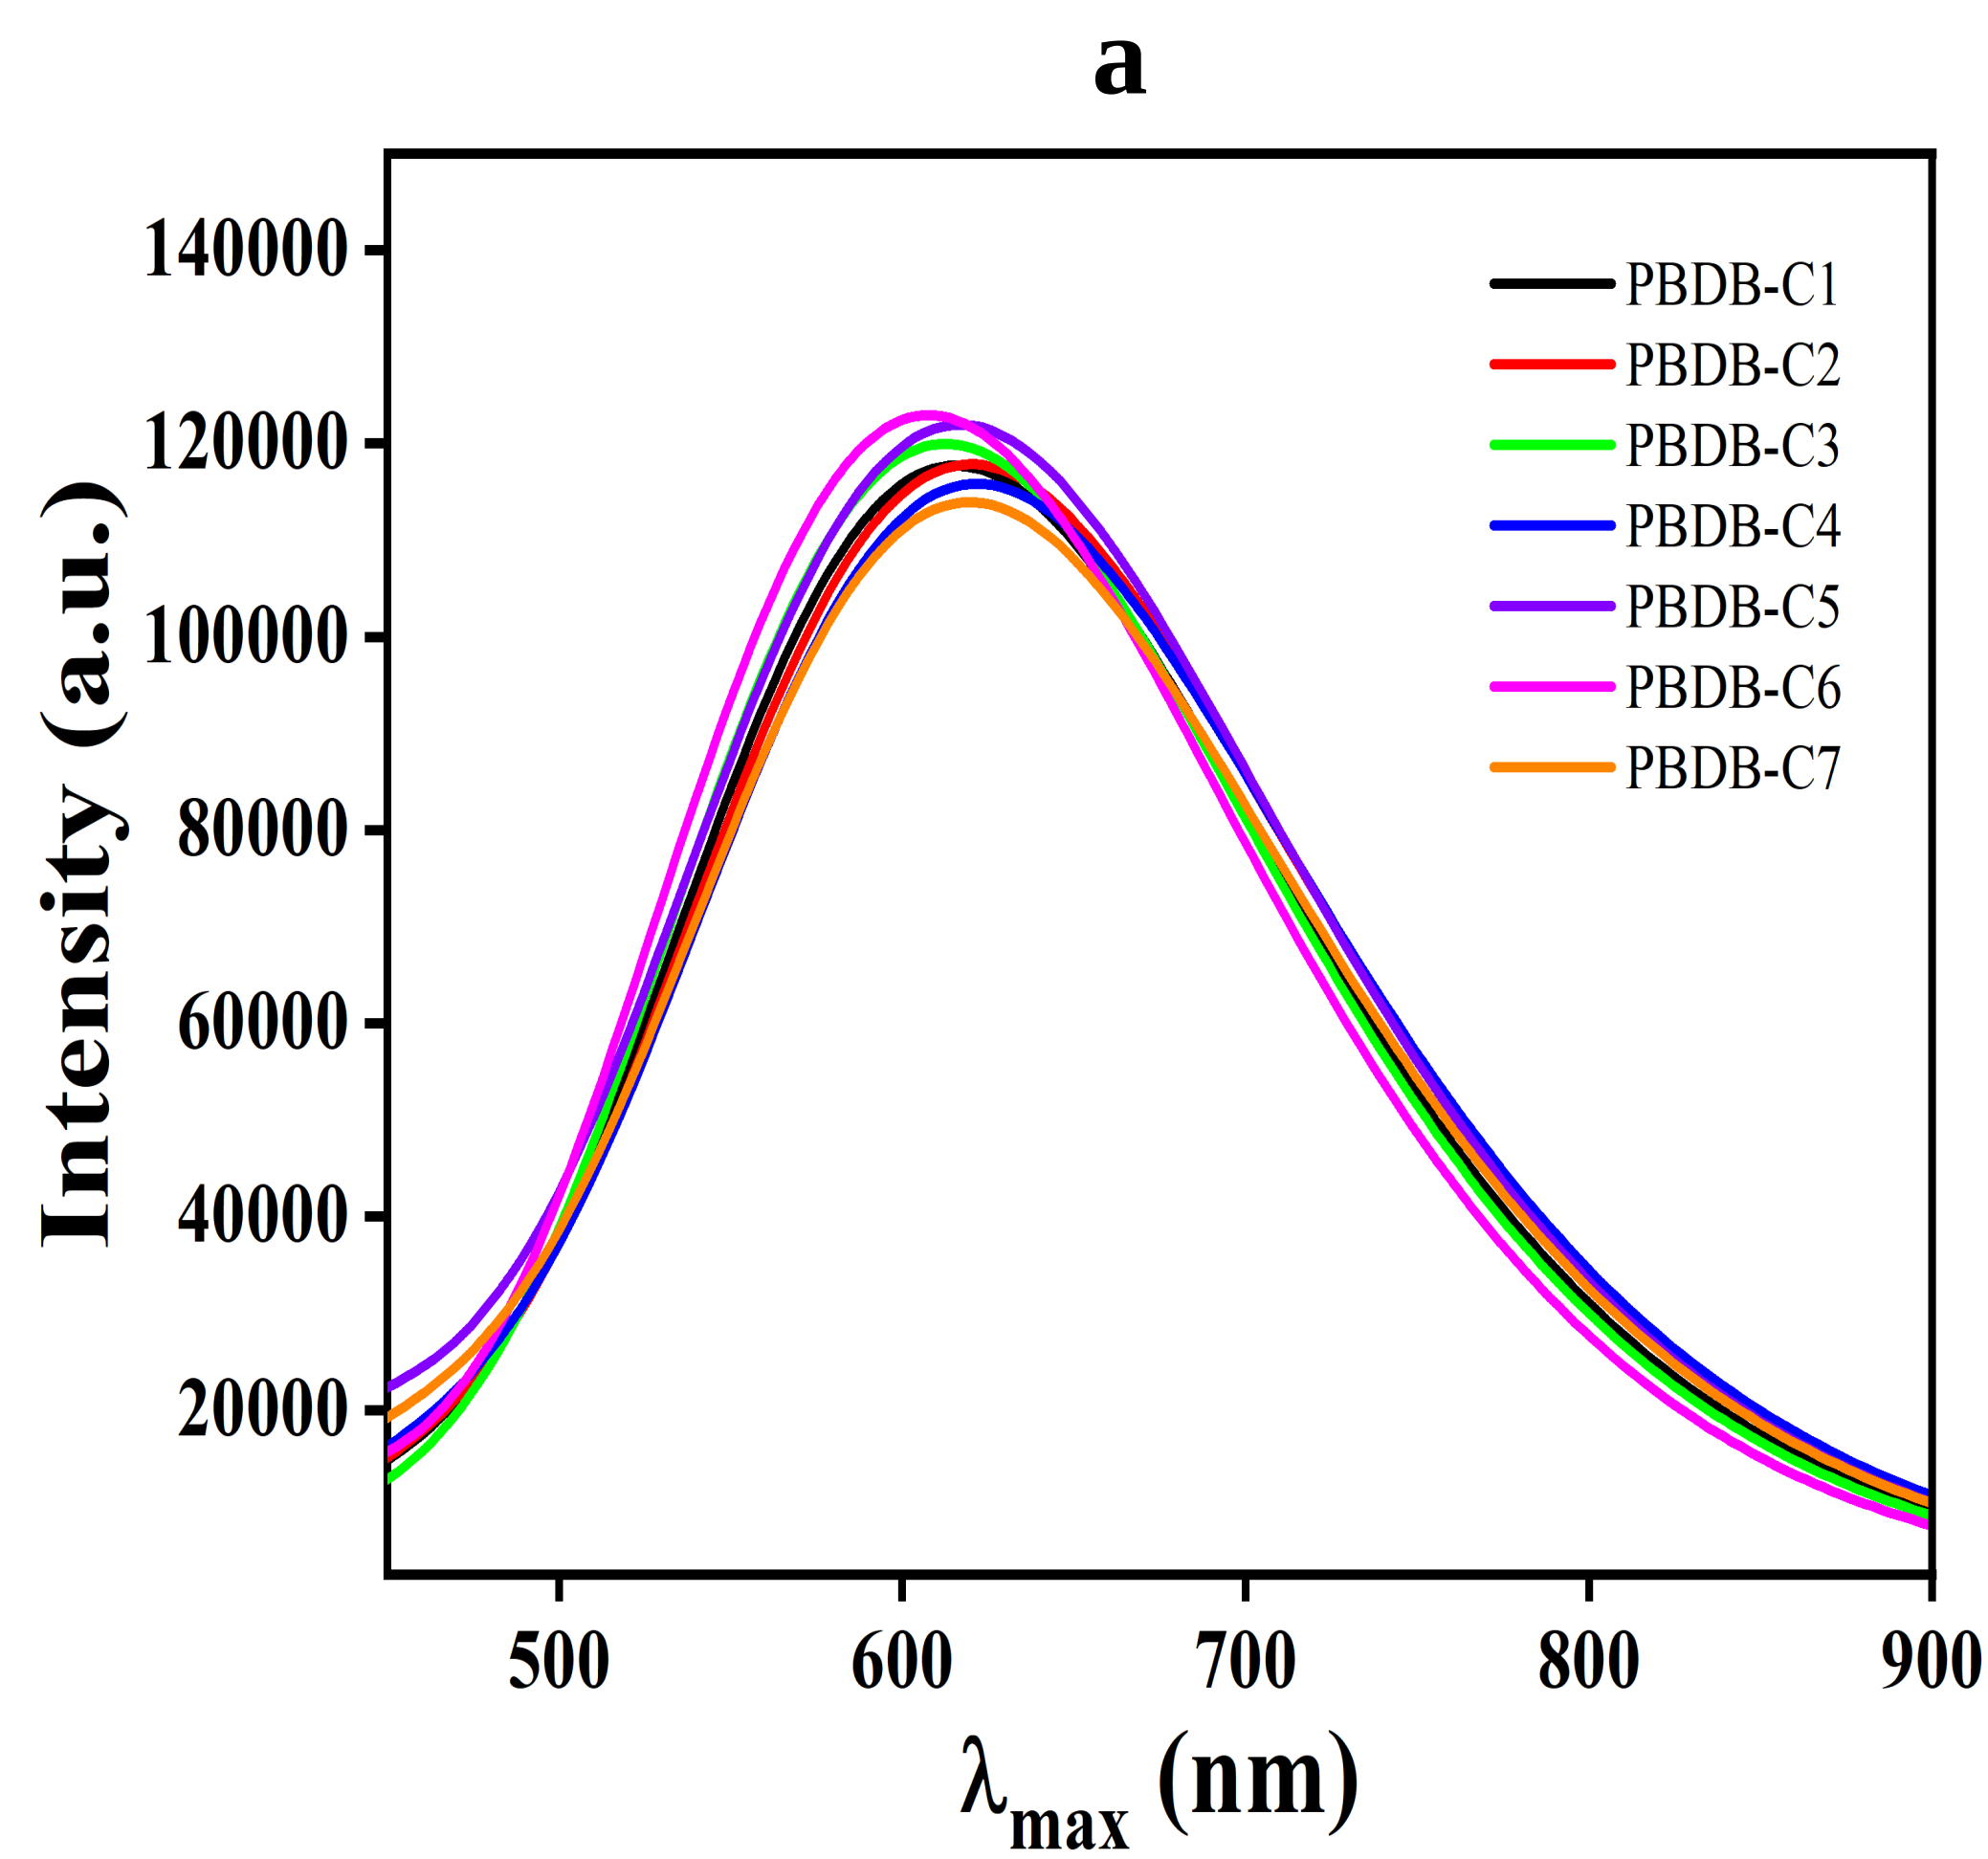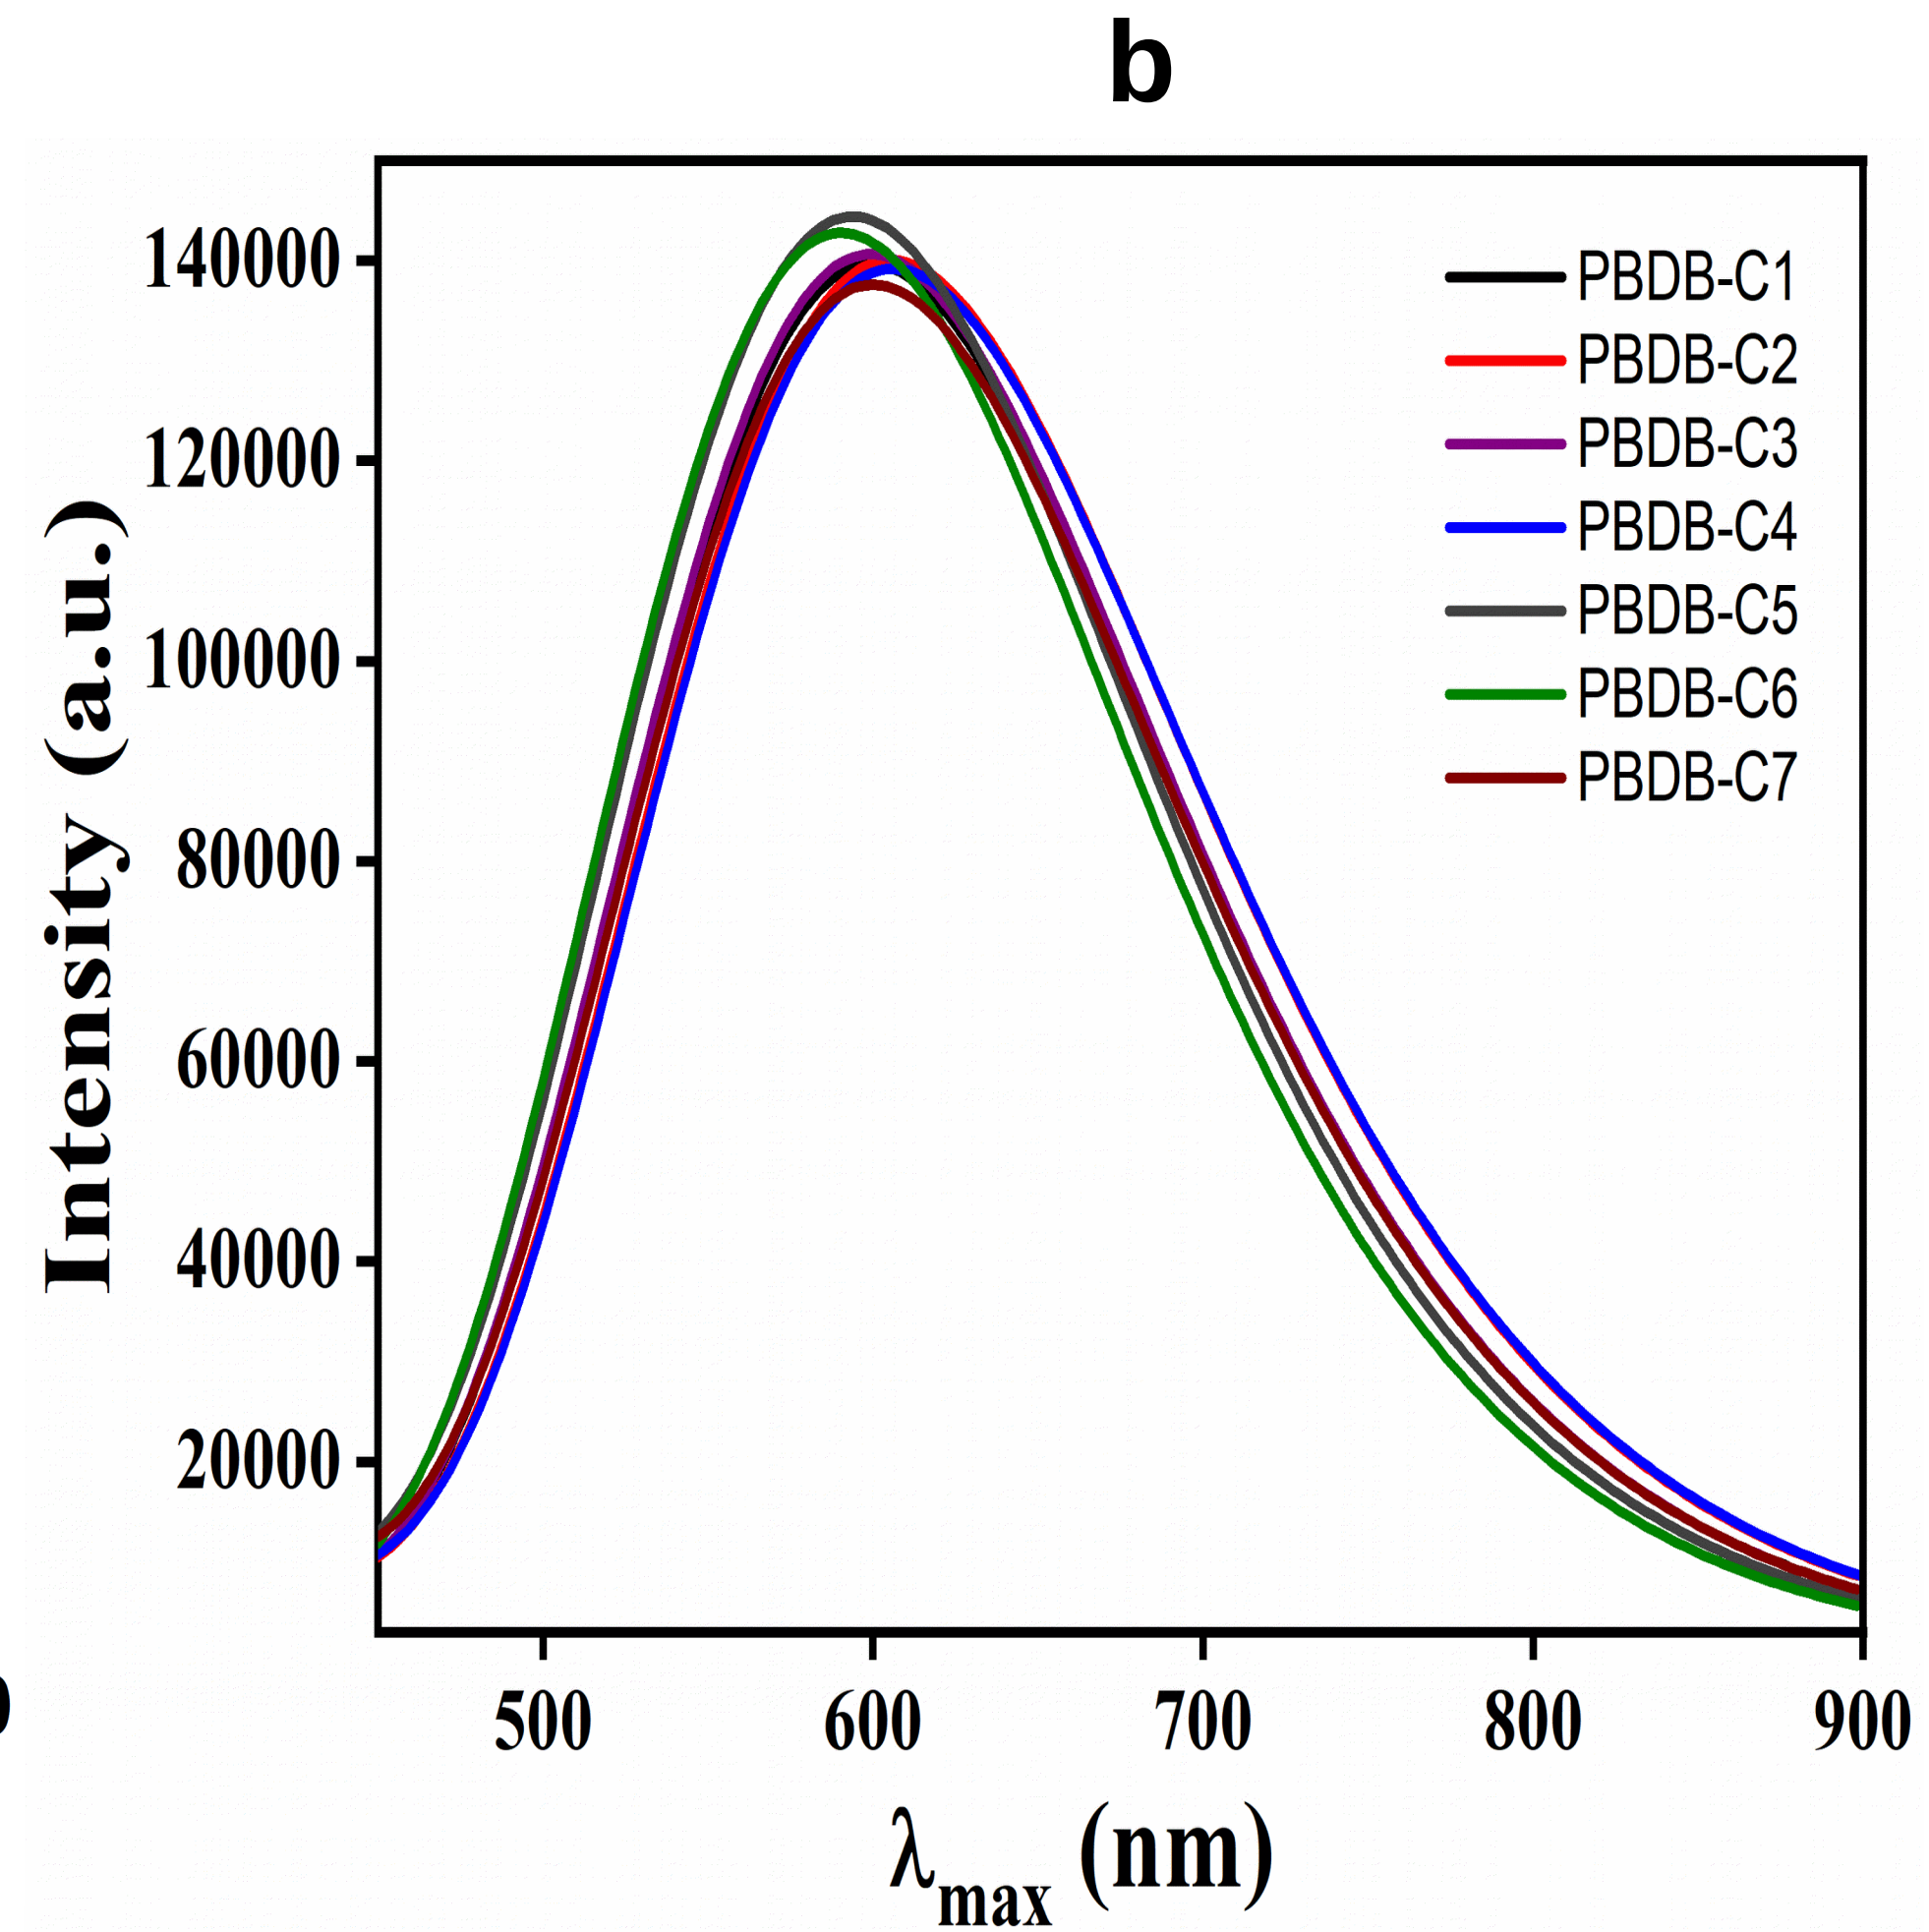

Supplement: d2ra01820a1.pdf [file d2ra01820a1.pdf]

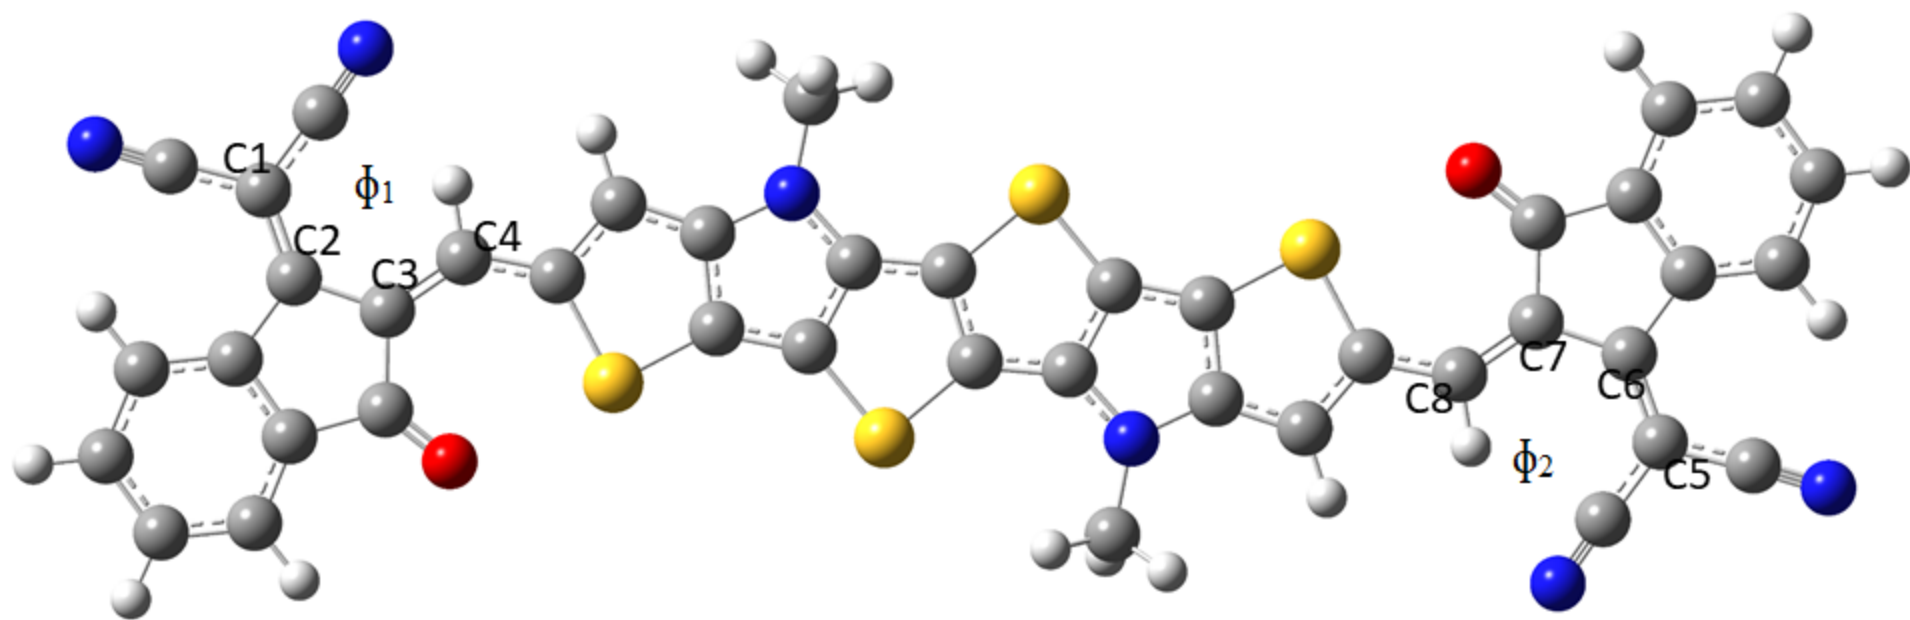

Supplement: d2ra01820a2.pdf [file d2ra01820a2.pdf]

### PBDB-C4

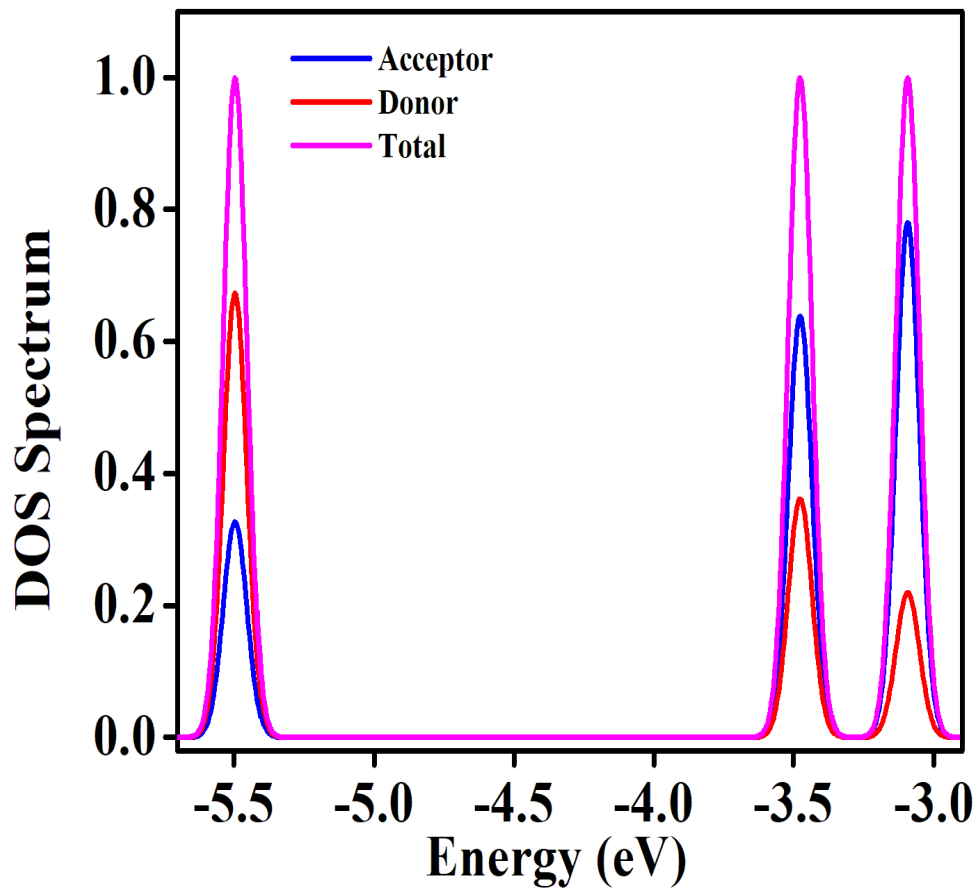

### PBDB-C6

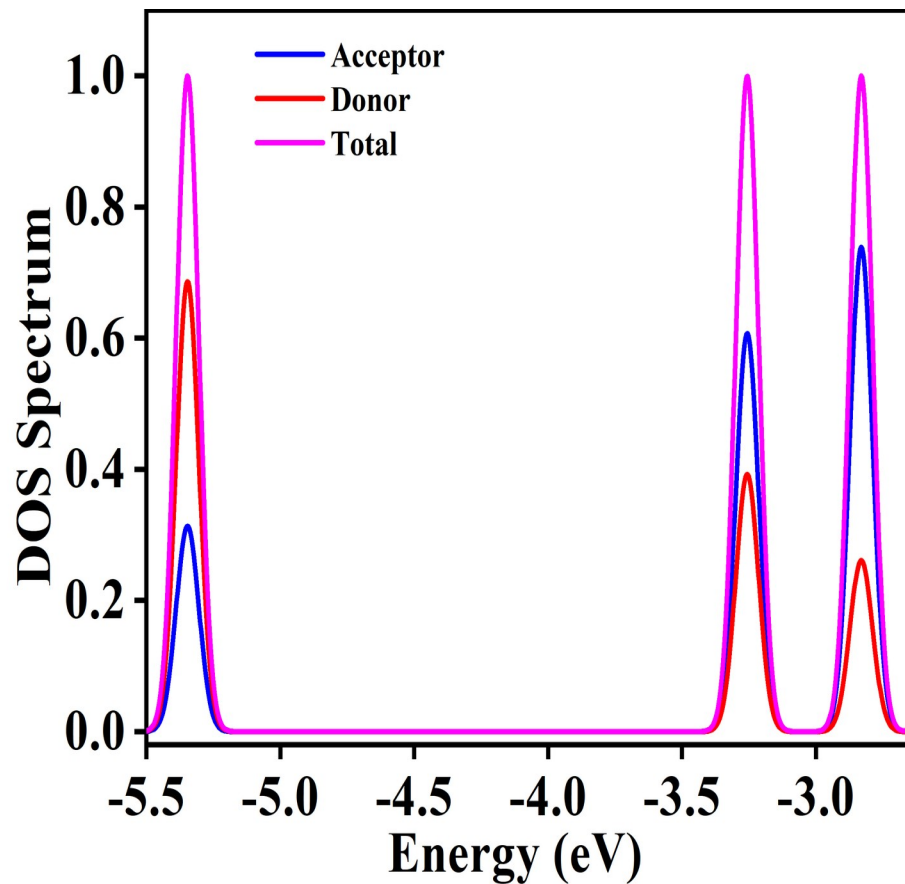

Supplement: d2ra01820a3.pdf [file d2ra01820a3.pdf]

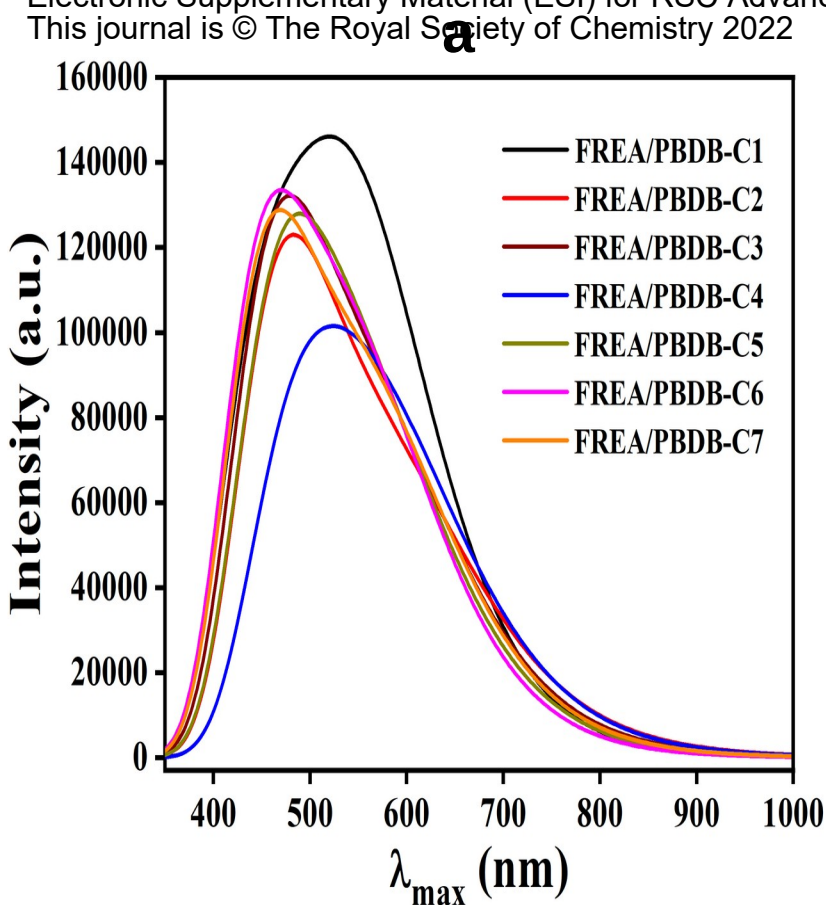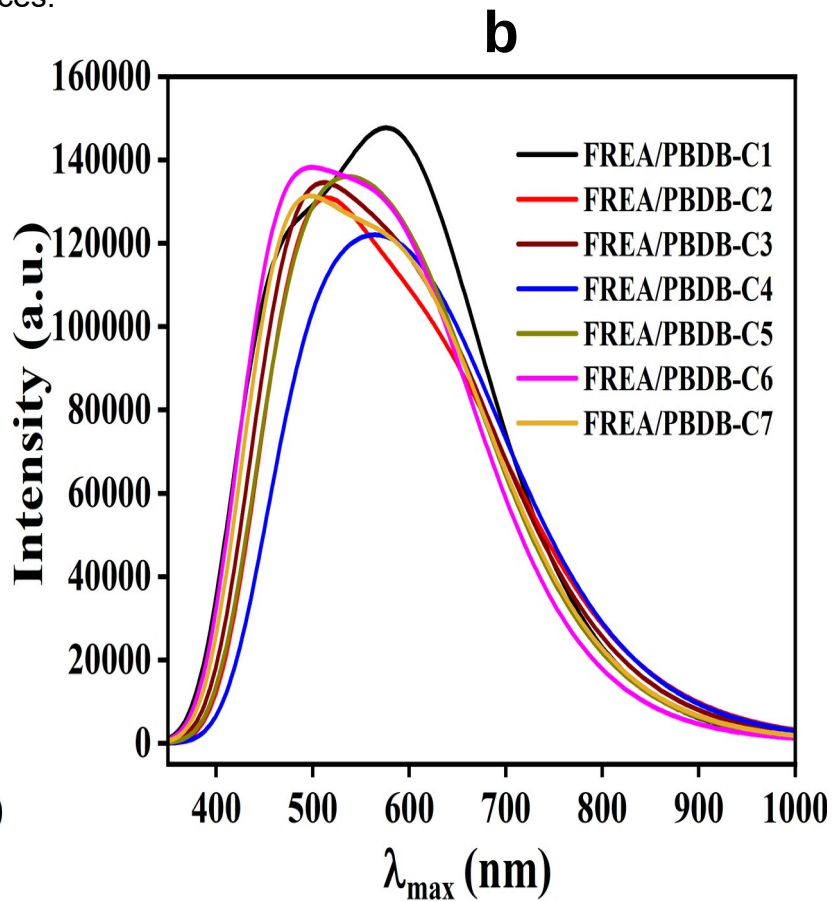

Supplement: d2ra01820a4.pdf [file d2ra01820a4.pdf]
